# Supplementary material for: Low-flow assessment of current ECMO/ECCO2R rotary blood pumps and the potential effect on hemocompatibility
Source: Springer Nature journal article supplement (doi:10.1186/s13054-019-2622-3), 2019-11-06

Additional File 2

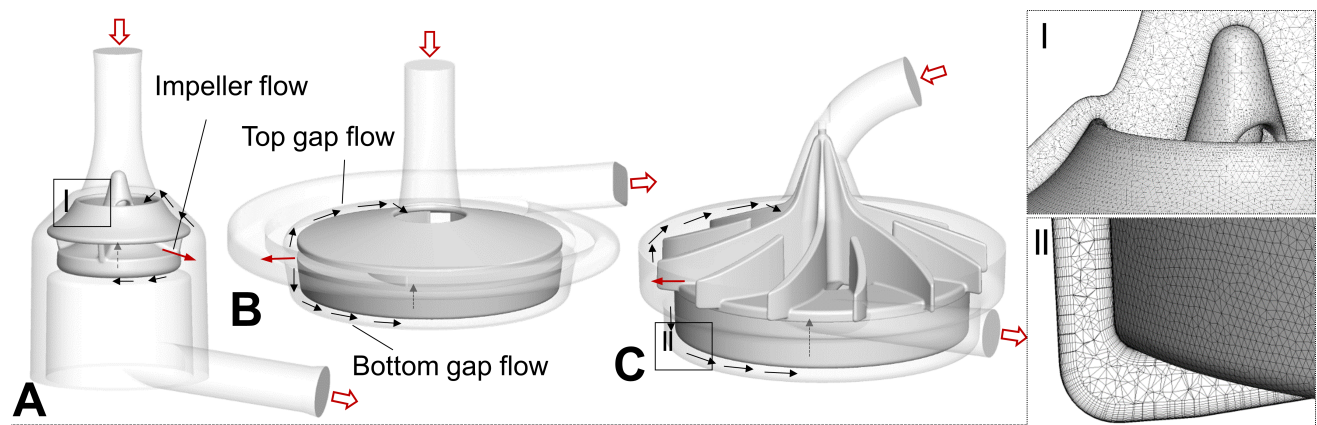

Supplement: MOESM2 [file 17357194]
